# Supplementary material for: Stability investigation of graphene oxide–silver nanoparticles composites in natural reservoir water
Source: Royal Society of Chemistry journal article supplement (doi:10.1039/c3ra44691c), 2013-01-01
Supplement: c3ra44691c.pdf [file c3ra44691c.pdf]

## 20 Supplementary Results

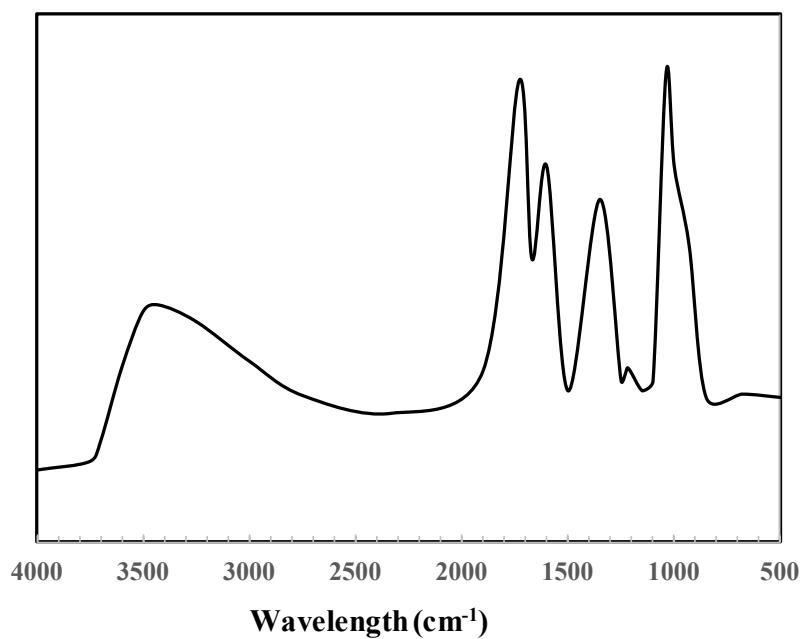

21

22 **Fig. S1.** FTIR spectra of the synthesized GO by using a Hummer's method

23

24

25

26

27

28

29

30

31

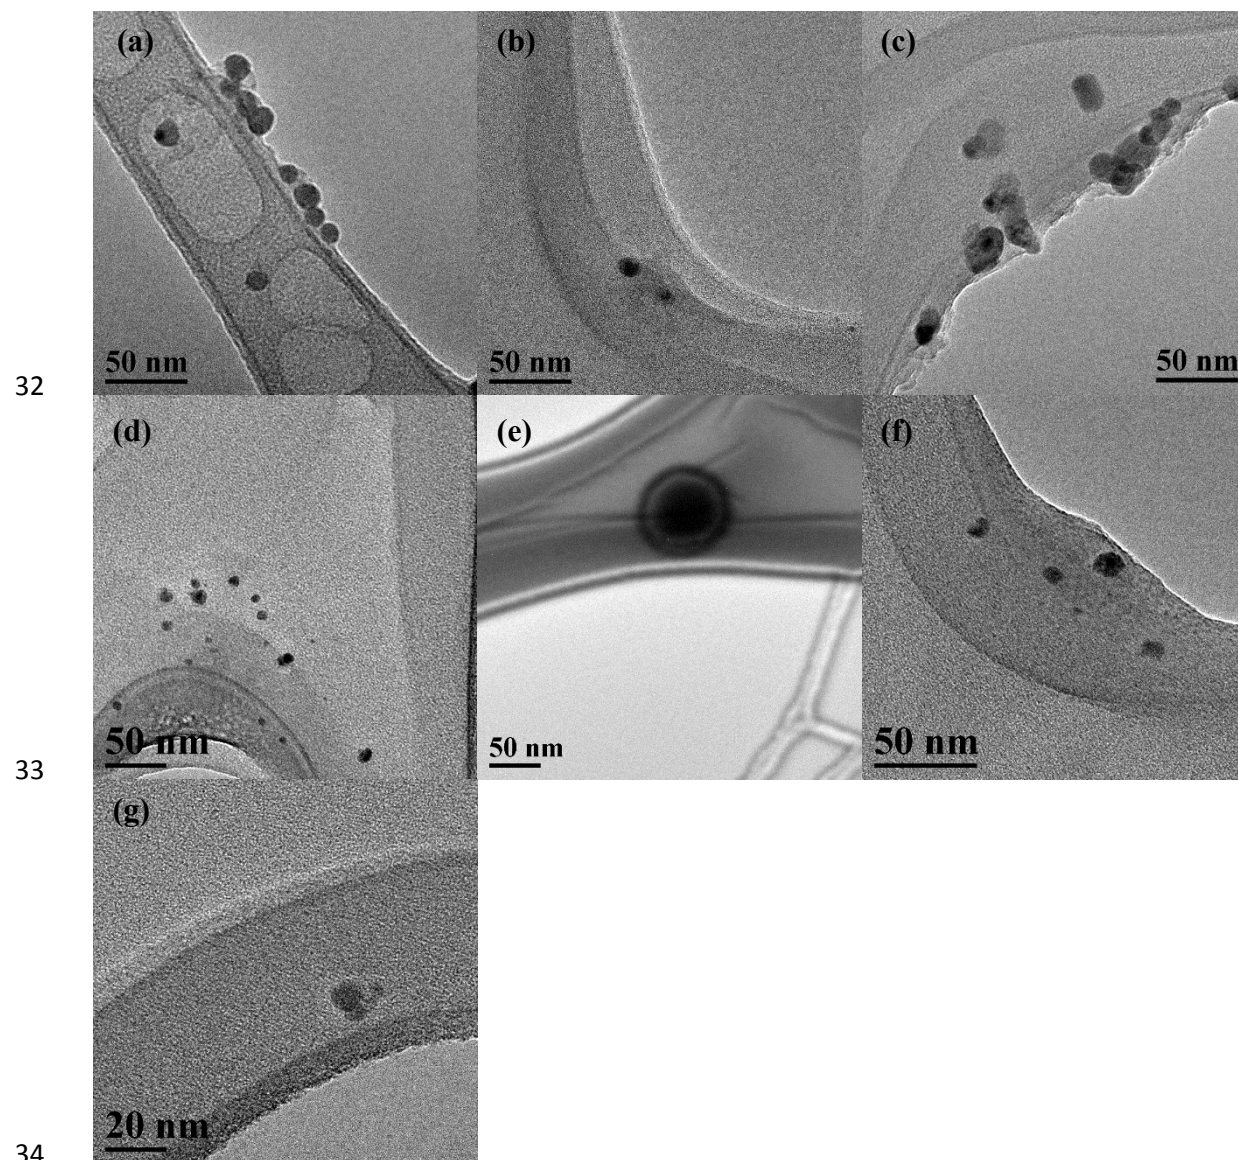

**Fig. S2.** TEM images of citrate-AgNPs composites in DI water solutions with different electrolytes (5 mg/L), (a) NaCl, (b)  $\text{Ca}(\text{NO}_3)_2$ , (c)  $\text{CaCl}_2$ , (d)  $\text{Na}_2\text{SO}_4$ , (e)  $\text{NaNO}_3$ , (f) HA (10 mg/L) and (g) E.coli ( $10^3$  CFU/mL) at pH 7 after exposure to natural light for 12 h.

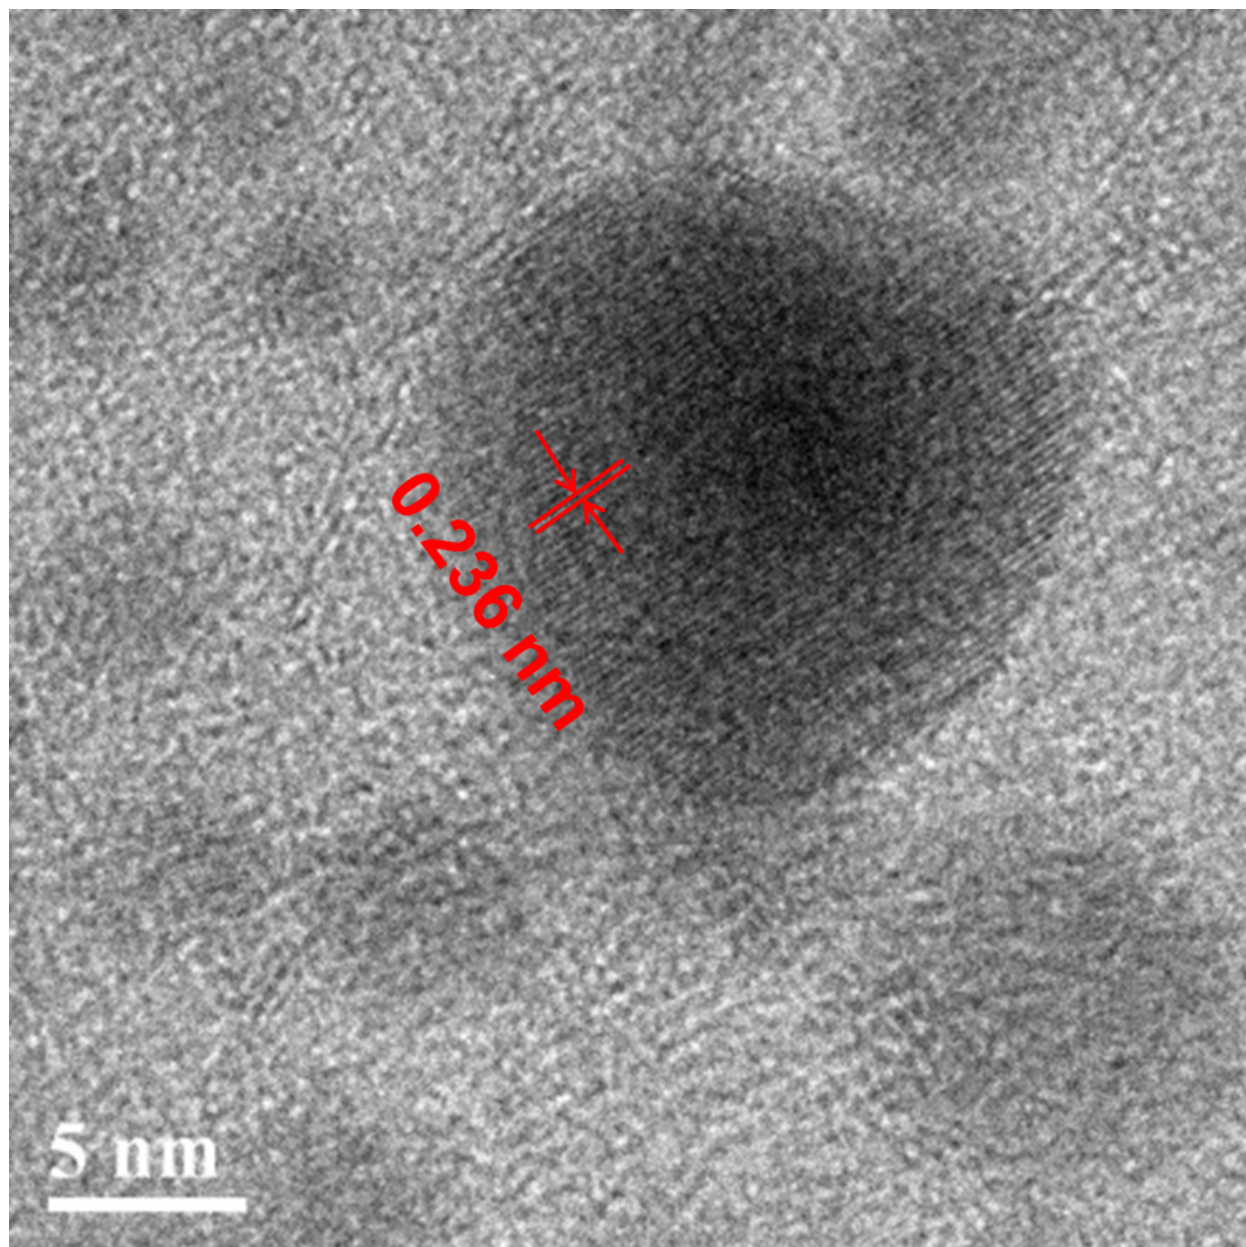

42  
43 **Fig. S3.** High magnification high resolution TEM (HRTEM) image of an individual AgNP anchored on  
44 the surface of GO sheet with clear lattice fringe spacing of 0.236 nm, which is ascribed to the typical (111)  
45 plane of Ag.<sup>1</sup>

46  
47  
48

**Table S1.** Binding energies and the corresponding FWHM of each element analyzed by XPS

|              | <b>Position (eV)</b> | <b>FWHM (eV)</b> |
|--------------|----------------------|------------------|
|              | 284.6                | 1.57058          |
| <b>C 1s</b>  | 286.869              | 1.25398          |
|              | 288.13               | 1.41724          |
|              | 368.165              | 1.19668          |
| <b>Ag 3d</b> | 374.092              | 1.06239          |
|              | 369.02               | 0.888914         |
|              | 374.828              | 1.06894          |
|              | 532.44               | 1.66161          |
| <b>O 1s</b>  | 530.884              | 1.80274          |
|              | 529.223              | 1.19445          |

49

50

51

52

53

54

55

56

57

58

59

60

61



**Table S2.** Concentration of Ag released from GO-AgNPs composites suspensions at different conditions

| Conditions for GO-AgNPs composites                       | Concentration of Ag (mg/L) |              |              |              |
|----------------------------------------------------------|----------------------------|--------------|--------------|--------------|
|                                                          | Average                    | Triplicate 1 | Triplicate 2 | Triplicate 3 |
| DI Water                                                 | -0.017                     | -0.017       | -0.018       | -0.017       |
| DI water solution, pH 3                                  | 0.002                      | -0.017       | -0.018       | -0.017       |
| DI water solution, pH 7                                  | -0.002                     | 0.002        | 0.002        | 0.002        |
| DI water solution, pH 11                                 | -0.001                     | -0.002       | -0.003       | -0.001       |
| 5 mg/L NaCl solution, pH =7                              | -0.003                     | -0.001       | -0.001       | -0.003       |
| 5 mg/L NaNO <sub>3</sub> solution, pH =7                 | -0.003                     | -0.004       | -0.004       | -0.003       |
| 5 mg/L Na <sub>2</sub> SO <sub>4</sub> solution, pH =7   | -0.003                     | -0.003       | -0.003       | -0.003       |
| 5 mg/L CaCl <sub>2</sub> solution, pH =7                 | -0.003                     | -0.003       | -0.003       | -0.003       |
| 5 mg/L Ca(NO <sub>3</sub> ) <sub>2</sub> solution, pH =7 | -0.003                     | -0.003       | -0.003       | -0.002       |
| 10 mg/L humic acid solution, pH =7                       | 0.004                      | 0.004        | 0.004        | 0.004        |
| 10 <sup>3</sup> CFU/mL E.coli solution, pH =7            | -0.002                     | -0.002       | -0.002       | -0.002       |
| NRW, 1 <sup>st</sup>                                     | 0.009                      | 0.008        | 0.009        | 0.01         |
| NRW, 2 <sup>nd</sup>                                     | 0.02                       | 0.019        | 0.02         | 0.021        |
| NRW, 3 <sup>rd</sup>                                     | 0.015                      | 0.015        | 0.015        | 0.014        |
| NRW, 4 <sup>th</sup> day                                 | 0.017                      | 0.016        | 0.017        | 0.017        |
| NRW, 7 <sup>th</sup> day                                 | 0.016                      | 0.016        | 0.016        | 0.016        |
| NRW, original                                            | -0.003                     | -0.003       | -0.002       | -0.002       |

62

63

64 **References**

- 65 1. Liu, L.; Liu, J.; Wang, Y.; Yan, X.; Sun, D. D., Facile synthesis of monodispersed silver  
66 nanoparticles on graphene oxide sheets with enhanced antibacterial activity. *New Journal of Chemistry*  
67 **2011**, *35*, (7), 1418-1423.

68

69
